# Supplementary material for: Comparison of Structured Nutrition Therapy for Ramadan with Standard Care in Type 2 Diabetes Patients
Source: MDPI journal article supplement (doi:10.3390/nu12030813), 2020-03-19
Supplement: s1 [file s1]

**Table S1.** Energy intake recommendation and carbohydrate exchange distribution during Ramadan

| Energy intake (kcal/day)               | 1200                                    | 1500                                                                                                  | 1800                          |
|----------------------------------------|-----------------------------------------|-------------------------------------------------------------------------------------------------------|-------------------------------|
| <b>Recommended group</b>               | Women with height <150 cm (weight loss) | Women with height <150 cm (weight maintenance), or women with height >150cm (weight loss/maintenance) | Men (weight loss/maintenance) |
| <b>Carbohydrate exchanges</b>          | <b>10</b>                               | <b>12</b>                                                                                             | <b>14</b>                     |
| <b>Distribution between meal times</b> |                                         |                                                                                                       |                               |
| <i>Suhoor</i>                          | 3                                       | 4                                                                                                     | 5                             |
| <b>Snack 1</b>                         | 2                                       | 2                                                                                                     | 2                             |
| <i>Iftar</i>                           | 3                                       | 4                                                                                                     | 5                             |
| <b>Snack 2</b>                         | 2                                       | 2                                                                                                     | 2                             |

Table modified from IDF and DAR International Alliance Guidelines [2]

Snack 1: a small snack before *Iftar* (also called “Mini *Iftar*”)

Snack 2: pre-bed snack, typically taken after *Taraweeh* prayer

**Table S2.** Daily energy intake distribution during Ramadan

| Mealtime       | %TEI  |
|----------------|-------|
| <i>Suhoor</i>  | 30-40 |
| <b>Snack 1</b> | 10-20 |
| <i>Iftar</i>   | 30-40 |
| <b>Snack 2</b> | 10-20 |

%TEI, percentage from total energy intake

**Table S3.** Sample menu for one day

| Energy intake distribution    | 1200 kcal/day                                                                                                                                                                                                                                                                                                                                                   | 1500 kcal/day                                                                                                                                                                                                                                                                                                                                                 | 1800 kcal/day                                                                                                                                                                                                                                                                                                                                                                                            |
|-------------------------------|-----------------------------------------------------------------------------------------------------------------------------------------------------------------------------------------------------------------------------------------------------------------------------------------------------------------------------------------------------------------|---------------------------------------------------------------------------------------------------------------------------------------------------------------------------------------------------------------------------------------------------------------------------------------------------------------------------------------------------------------|----------------------------------------------------------------------------------------------------------------------------------------------------------------------------------------------------------------------------------------------------------------------------------------------------------------------------------------------------------------------------------------------------------|
| <i>Suhoor</i><br>(30-40%TEI)  | <b>Fried rice with egg</b><br><ul style="list-style-type: none"> <li>• Brown rice, 1 cup</li> <li>• Egg, 1 whole</li> <li>• Carrot and long beans, 1 cup</li> </ul> <b>Vegetable salad</b><br><ul style="list-style-type: none"> <li>• Lettuce, tomato and cucumber – 1 ½ cup</li> </ul> <b>DSF</b> , 3 ½ scoops + 120 ml water<br>(~400 kcal, 3 CHO exchanges) | <b>Fried rice with egg</b><br><ul style="list-style-type: none"> <li>• Brown rice, 1 cup</li> <li>• Egg, 1 whole</li> <li>• Carrot and long beans, 1 cup</li> </ul> <b>Vegetable salad</b><br><ul style="list-style-type: none"> <li>• Lettuce, tomato and cucumber – 1 ½ cup</li> </ul> <b>DSF</b> , 7 scoops + 210 ml water<br>(~530 kcal, 4 CHO exchanges) | <b>Fried rice with egg</b><br><ul style="list-style-type: none"> <li>• Brown rice, 1 ½ cup</li> <li>• Egg, 1 whole</li> <li>• Chicken breast, 1 piece (40g)</li> <li>• Carrot and long beans, 1 cup</li> </ul> <b>Vegetable salad</b><br><ul style="list-style-type: none"> <li>• Lettuce, tomato and cucumber – 1 ½ cup</li> </ul> <b>DSF</b> , 7 scoops + 210 ml water<br>(~685 kcal, 5 CHO exchanges) |
| <b>Snack 1</b><br>(10-20%TEI) | <b>Dragon fruit DSF shake</b><br><ul style="list-style-type: none"> <li>• Dragon fruit, 3 slices (94g)</li> <li>• DSF, 3 ½ scoops + 120 ml water</li> </ul> (~195kcal, 2 CHO exchanges)                                                                                                                                                                         | <b>Dragon fruit DSF shake</b><br><ul style="list-style-type: none"> <li>• Dragon fruit, 3 slices (94g)</li> <li>• DSF, 3 ½ scoops + 120 ml water</li> </ul> (~195kcal, 2 CHO exchanges)                                                                                                                                                                       | <b>Dragon fruit DSF shake</b><br><ul style="list-style-type: none"> <li>• Dragon fruit, 3 slices (94g)</li> <li>• DSF, 3 ½ scoops + 120 ml water</li> </ul> (~195kcal, 2 CHO exchanges)                                                                                                                                                                                                                  |
| <i>Iftar</i><br>(30-40%TEI)   | <b>Rice with side dishes</b><br><ul style="list-style-type: none"> <li>• Brown rice, 1 cup</li> </ul>                                                                                                                                                                                                                                                           | <b>Rice with side dishes</b><br><ul style="list-style-type: none"> <li>• Brown rice, 1 ½ cup</li> </ul>                                                                                                                                                                                                                                                       | <b>Rice with side dishes</b><br><ul style="list-style-type: none"> <li>• Brown rice, 2 cups</li> </ul>                                                                                                                                                                                                                                                                                                   |

|                                      |                                                                                                                                                                                                                                                                                        |                                                                                                                                                                                                                                                                                          |                                                                                                                                                                                                                                                                                          |
|--------------------------------------|----------------------------------------------------------------------------------------------------------------------------------------------------------------------------------------------------------------------------------------------------------------------------------------|------------------------------------------------------------------------------------------------------------------------------------------------------------------------------------------------------------------------------------------------------------------------------------------|------------------------------------------------------------------------------------------------------------------------------------------------------------------------------------------------------------------------------------------------------------------------------------------|
|                                      | <ul style="list-style-type: none"> <li>• Spanish mackerel curry, 1 piece (66g raw)</li> <li>• Pak choi, cooked, 1 cup</li> <li>• Stir fried tofu (1 piece, 64g) and beansprouts (1/2 cup)</li> </ul> <b>Kiwi</b> , 1 whole (100g)<br><b>Plain water</b><br>(~375kcal, 3 CHO exchanges) | <ul style="list-style-type: none"> <li>• Spanish mackerel curry, 1 ½ piece (99g raw)</li> <li>• Pak choi, cooked, 1 cup</li> <li>• Stir fried tofu (1 piece, 64g) and beansprouts (1/2 cup)</li> </ul> <b>Kiwi</b> , 1 whole (100g)<br><b>Plain water</b><br>(~530kcal, 4 CHO exchanges) | <ul style="list-style-type: none"> <li>• Spanish mackerel curry, 1 ½ piece (99g raw)</li> <li>• Pak choi, cooked, 1 cup</li> <li>• Stir fried tofu (1 piece, 64g) and beansprouts (1/2 cup)</li> </ul> <b>Kiwi</b> , 1 whole (100g)<br><b>Plain water</b><br>(~710kcal, 5 CHO exchanges) |
| <b>Snack 2</b><br><b>(10-20%TEI)</b> | <b>Roti jala</b> <ul style="list-style-type: none"> <li>• <i>Roti jala</i>, 2 rolls</li> <li>• Dhal curry, ½ cup (90g)</li> </ul> <b>Plain water or tea/coffee without sugar</b> , 1 cup<br>(~215kcal, 2 CHO exchanges)                                                                | <b>Roti jala</b> <ul style="list-style-type: none"> <li>• <i>Roti jala</i>, 2 rolls</li> <li>• Dhal curry, ½ cup (90g)</li> </ul> <b>Plain water or tea/coffee without sugar</b> , 1 cup<br>(~215kcal, 2 CHO exchanges)                                                                  | <b>Roti jala</b> <ul style="list-style-type: none"> <li>• <i>Roti jala</i>, 2 rolls</li> <li>• Dhal curry, ½ cup (90g)</li> </ul> <b>Plain water or tea/coffee without sugar</b> , 1 cup<br>(~215kcal, 2 CHO exchanges)                                                                  |
| <b>Total CHO exchanges</b>           | 10                                                                                                                                                                                                                                                                                     | 12                                                                                                                                                                                                                                                                                       | 14                                                                                                                                                                                                                                                                                       |

%TEI, percentage from total energy intake; CHO, carbohydrate; kcal, calories; DSF, diabetes specific formula

*Roti jala*: A popular Malaysian snack typically served with curry; similar texture with soft crepe  
 DSF: 3 ½ scoops constitute 1 exchange of carbohydrate

**Table S4.** Ramadan nutrition plate composition

| <b>Plate composition</b> | <b>Details</b>                                                                                                                                                                        |
|--------------------------|---------------------------------------------------------------------------------------------------------------------------------------------------------------------------------------|
| ¼ Carbohydrates          | <ul style="list-style-type: none"> <li>• Includes rice, noodle, bread, grain, grain products</li> <li>• Choose whole-grain, high fiber, and low in GI carbohydrates</li> </ul>        |
| ¼ Protein                | <ul style="list-style-type: none"> <li>• Includes fish, chicken, beef, and plant protein</li> <li>• Choose lean beef/poultry cuts</li> <li>• Choose low fat cooking method</li> </ul> |
| ½ Vegetables             | <ul style="list-style-type: none"> <li>• Includes non-starchy vegetables such as carrot, tomatoes</li> <li>• Eat vegetables before carbohydrates</li> </ul>                           |
| Soup or gravy            | <ul style="list-style-type: none"> <li>• Choose low fat cooking method</li> </ul>                                                                                                     |
| Fruit                    | <ul style="list-style-type: none"> <li>• Choose fresh fruit or dates</li> </ul>                                                                                                       |
| Water                    | <ul style="list-style-type: none"> <li>• Choose plain water</li> <li>• Reduce intake of caffeinated drink</li> </ul>                                                                  |
